# Supplementary material
Source: Royal Society of Chemistry journal article supplement (doi:10.1039/d5nj05023e)
Supplement: d5nj05023e1.pdf [file d5nj05023e1.pdf]

## Supplementary Information

### Electrochemical dehydrogenation of cyclohexane to cyclohexene in a proton-conducting solid oxide electrolyzer

Yuxuan Xiang,<sup>a,b,c,d</sup> Mingyao Miao,<sup>a,b,c,d</sup> Wenting Li,<sup>a,b,c,d</sup> Qingfang Huang,<sup>b,e,\*</sup> Zixiang, Weng,<sup>a,c,d,\*</sup> Lixin Wu,<sup>a,c,d</sup> Lingting Ye,<sup>a,b,\*</sup>

<sup>a</sup> College of Chemistry and Materials Science, Fujian Normal University, Fuzhou 350117, China.

<sup>b</sup> Strait Laboratory of Flexible Electronics (SLoFE), Fujian Key Laboratory of Flexible Electronics, Strait Institute of Flexible Electronics (Future Technologies), Fujian Normal University, Fuzhou 350117, China. E-mail: ltye@fjnu.edu.cn

<sup>c</sup> Fujian Institute of Research on the Structure of Matter, Chinese Academy of Sciences, Fuzhou 350108, China.

<sup>d</sup> Fujian College, University of Chinese Academy of Sciences, Fuzhou 350108, China.

<sup>e</sup> Fujian Key Laboratory for Rare Earth Functional Materials, Longyan, 366300, China.

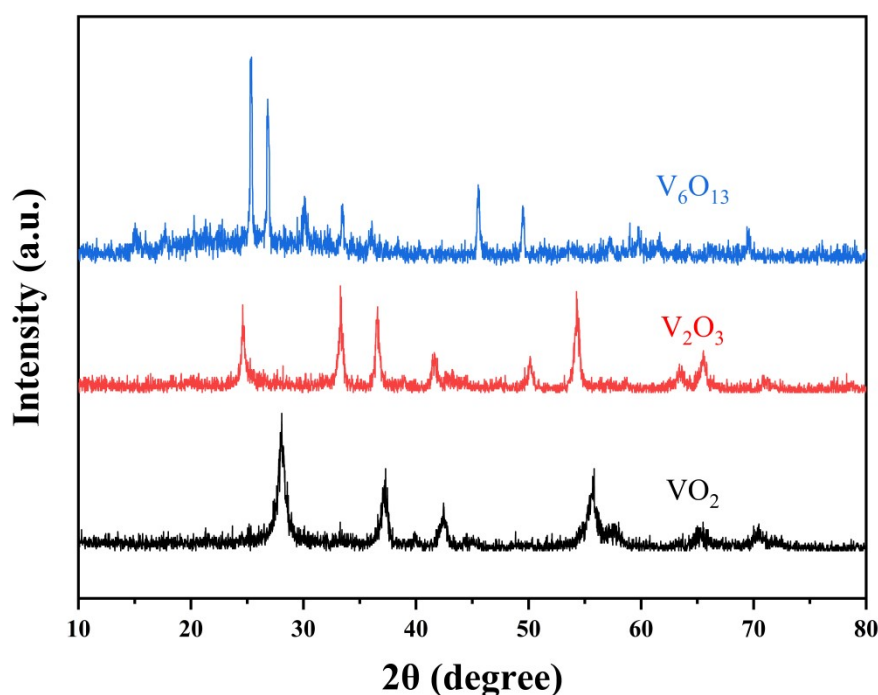

Fig.S1 XRD images of  $V_6O_{13}$ ,  $VO_2$  and  $V_2O_3$ .

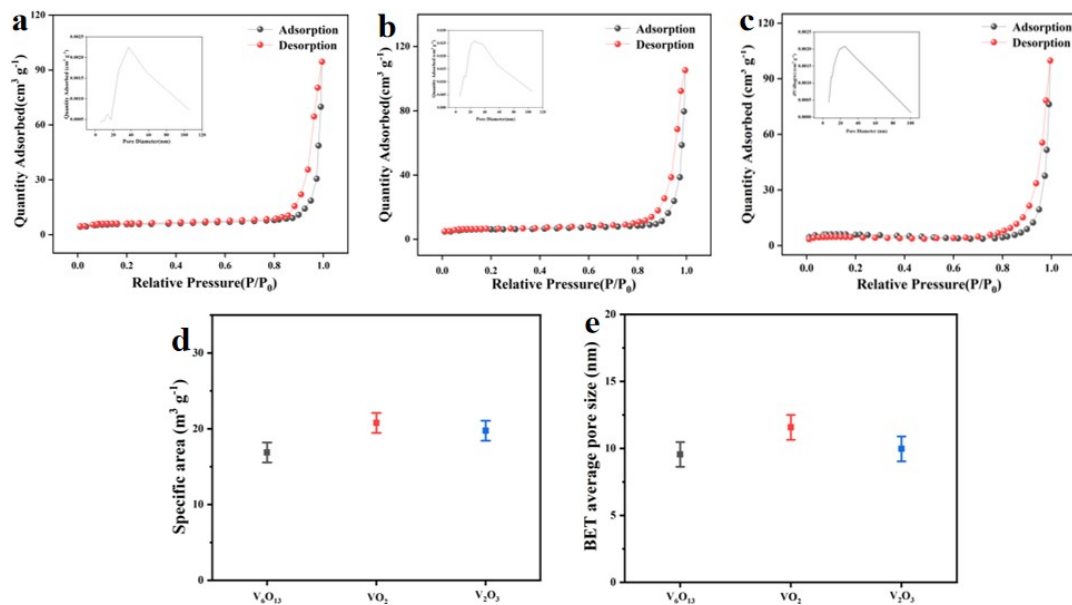

Fig.S2  $N_2$  adsorption-desorption isotherms and the corresponding pore diameter distribution of porous single crystal micron particles, (a)  $V_6O_{13}$ , (b)  $VO_2$  and (c)  $V_2O_3$ ; The surface specific area (d) and average pore size (e) of the porous single crystal micro particles.

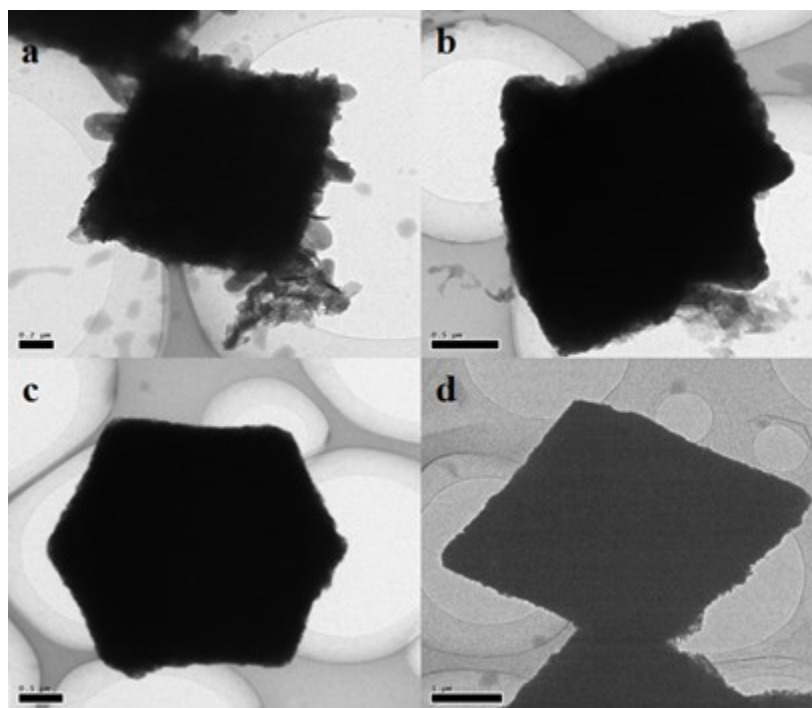

Fig.S3 TEM images of (a)  $\text{NH}_4\text{V}_4\text{O}_{10}$ , (b)  $\text{V}_6\text{O}_{13}$ , (c)  $\text{VO}_2$ , (d)  $\text{V}_2\text{O}_3$  porous single crystal microparticles.

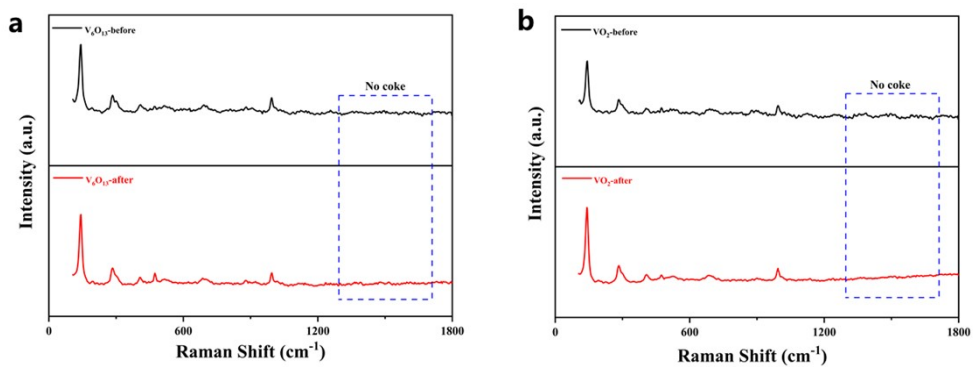

Fig.S4 Raman spectra of the PSC (a)  $\text{V}_6\text{O}_{13}$  and (b)  $\text{VO}_2$  powder before (black line) and after (red line) the dehydrogenation of ethane reaction.

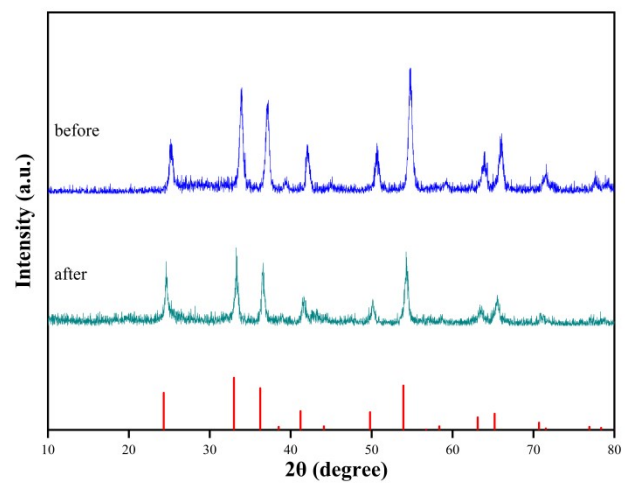

Fig.S5 Comparison of XRD patterns of  $V_2O_5$  before and after stability testing.

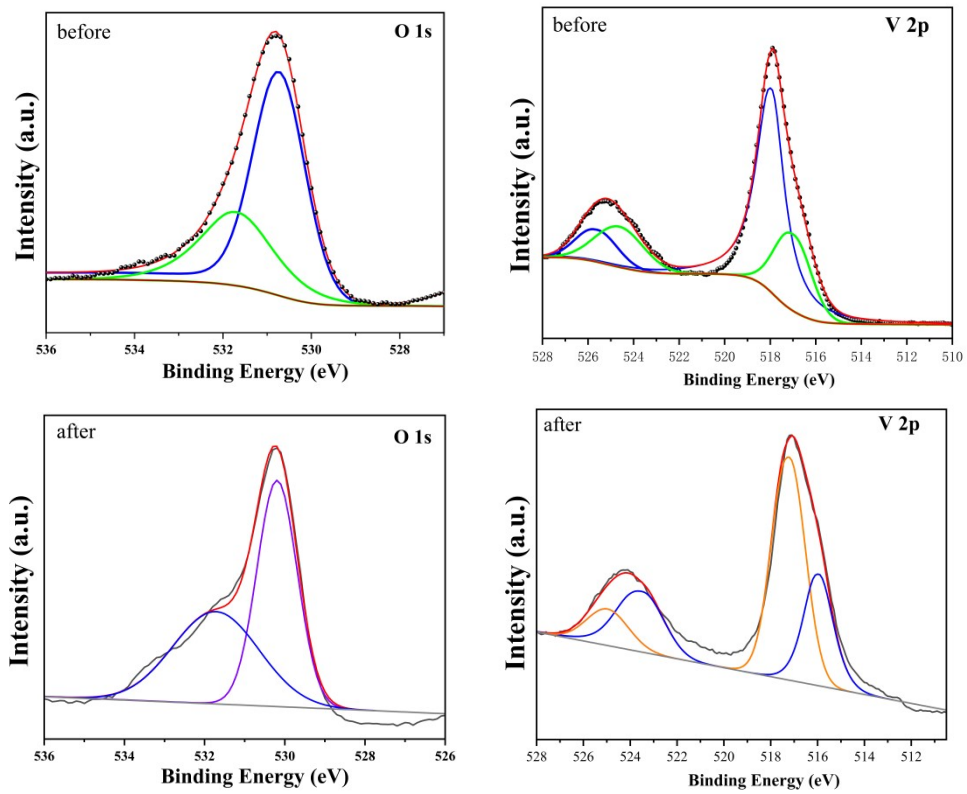

Fig.S6 Comparison of XPS patterns of  $V_2O_3$  before and after stability testing.

Fig.S7 Comparison of SEM patterns of electrode cross-section before and after stability testing.

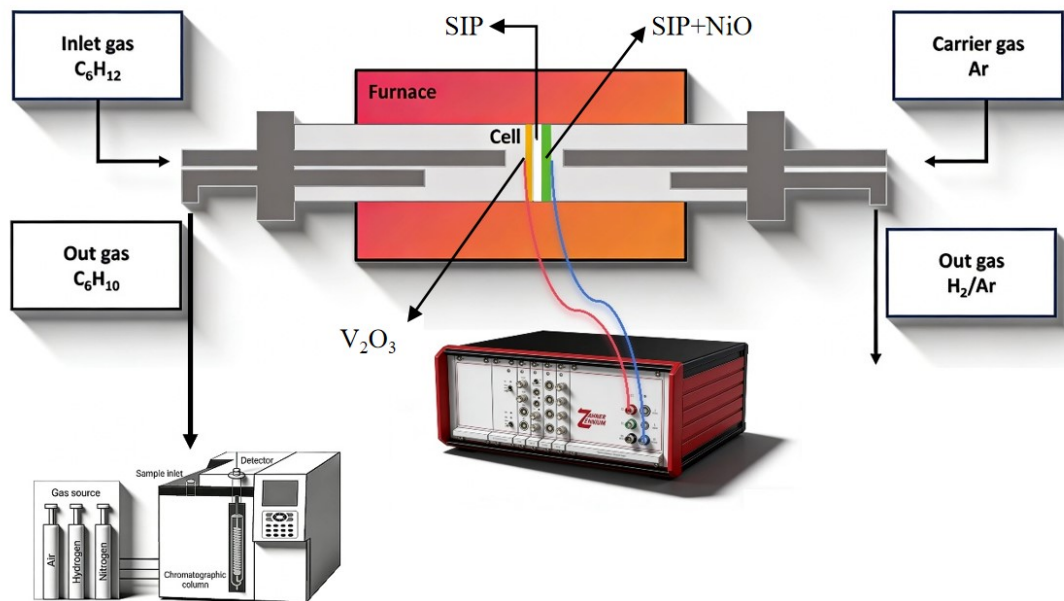

Fig.S8 Schematic of the performance measurement setup.
